# Supplementary material for: High throughput sequencing reveals a plethora of small RNAs including tRNA derived fragments in Haloferax volcanii
Source: PubMed Central journal article supplement — RNA Biol. 2012 Jul 1;9(7):1011–8. doi: 10.4161/rna.20826 (PMC3495736; doi:10.4161/rna.20826), 2012-07-01
Supplement: rna-9-1011-s01.pdf [file rna-9-1011-s01.pdf]

Supplemental Material to: Ruth Heyer, Marcella Dörr, Angelika Jellen-Ritter, Bettina Späth, Julia Babski, Katharina Jaschinski, et al. High throughput sequencing reveals a plethora of small RNAs including tRNA derived fragments in *Haloferax volcanii*. RNA Biology 2012; 9(7); DOI: 10.4161/rna.20826; <http://www.landesbioscience.com/journals/rnabiology/article/20826/>

## **Supplementary Tables**

**Supp.- Table 1. Expression profile of identified Hts sRNAs.** The 145 Hts sRNAs identified in this study are listed (column Hts) (sequences for the Hts RNAs are listed in Supplementary Table 2) and the number of reads identified for each Hts sRNA at the different conditions is listed. For each of the six growth conditions a separate column is shown: column standard: standard growth conditions; high T: 48.5°C growth temperature (instead of the standard 45°C); low salt concentration in the medium (15% instead of the standard 18%). Columns expo: RNA from cells grown to exponential phase, column stat: RNA from cells grown to stationary phase.

**Supp.- Table 2. Hts sRNA sequences.** The sequences for the 145 Hts sRNAs identified in this study are listed as well as the respective gene number (HVO\_XXXX).

**Supp.-Table 3. Expression of identified tRNA derived fragments.** The tRNA genes for which tRFs have been detected are shown. Column "start/ direction/ length" lists the start position of the respective tRNA gene on the *Haloferax* chromosome, the direction of the gene (F: forward, R: reverse) and the length of the encoded tRNA. Column "tRF" lists what type of tRF was found: 5': tRNA 5' fragment, 3' CCA: tRNA 3' fragment ending in CCA, 3' trailer: 3' trailer sequence. Column "reads at condition" lists the number of reads found at the listed condition.

**Supp.-Table 4. Comparison of growth yields of mutants and parent strain H119 under ten different conditions.** Three independent cultures were measured. The growth yields of the mutants are tabulated as fractions of that of the parent strain (%). The standard deviations are shown in parenthesis.

**Supp.-Table 5. Results of the comparison of the transcriptomes of mutant *Δhts10* and parent strain H119.** Tabulated are the gene or genes that differentially hybridised to the respective DNA microarray spots (HVO\_XXXX number see [www.halolex.mpg.de](http://www.halolex.mpg.de)), the annotated function, the number of times the gene is represented on the microarray and the fold induction of repression. Average values of three independent biological replicates are shown, which included one dye swap.

**Supp.-Table 6. tRNA genes encoded in the *Haloferax* genome.** All tRNA genes encoded in the *Haloferax* genome are listed. If fragments were detected for a tRNA in the HTS approach the number of reads found at the respective conditions are listed. Column "strand/ start/ length" lists the start position of the respective tRNA gene on the *Haloferax* chromosome, the direction of the gene (chr (+) and chr (-) indicates the genome strand) and the length of the encoded tRNA. Column "tRF" lists what type of tRF was found: 5': tRNA 5' fragment, 3' CCA: tRNA 3' fragment ending in CCA, 3' trailer: 3' trailer sequence. Column "reads at condition" lists the number of reads found at the listed condition. Condition 1 and 2 standard growth conditions exponential and stationary phase, respectively, condition 3 and 4: high temperature, exponential and stationary phase, respectively, condition 5 and 6: low salt concentrations, exponential and stationary phase, respectively.

**Supp.-Table 7. Primers used in this study.** Sequences of primers used in this study are listed.

**Supp.-Table 8. Target analysis for Hts sRNA 10 and up regulated mRNAs.** Using the programme IntaRNA potential target regions in the up regulated mRNAs were identified. As input sequence for the ncRNA the Hts10 sequence (Supplementary Table 2) and the mRNA sequences with 100 nt up- and downstream sequence each were used. **A.** Table listing the respective mRNA analysed (the HVO\_XXX number is shown, see Table 1), the binding energy between mRNA and Hts10 RNA and the positions involved in binding of the Hts10 sRNA as well as the mRNA. Below the table the interactions between Hts10 sRNA and the respective mRNA are shown. **B.** The potential targets can be clustered into four groups, where the respective mRNAs bind to similar or the same regions of the Hts10 sRNA. The mRNA clusters and their base pairing with the Hts10 RNA are shown. Nucleotides of the Hts RNA which bind to all target RNAs in one mRNA cluster are highlighted in yellow.

**Supplementary Table 1**

| Hts | standard |       | high T |      | low salt |       |
|-----|----------|-------|--------|------|----------|-------|
|     | expo     | stat  | expo   | stat | expo     | stat  |
| 1   | -        | -     | -      | -    | 3,810    | -     |
| 2   | -        | 42    | -      | -    | 7,277    | -     |
| 3   | 274      | -     | -      | 45   | 2,697    | 188   |
| 4   | 194      | 214   | 339    | 77   | 13,189   | 1,771 |
| 5   | 3,074    | 178   | -      | -    | 53       | 301   |
| 6   | 146      | -     | 47     | -    | 478      | 100   |
| 7   | -        | -     | -      | -    | -        | 40    |
| 8   | -        | -     | 41     | -    | -        | -     |
| 9   | 214      | 94    | 44     | 41   | -        | -     |
| 10  | 414      | 1,959 | 418    | 246  | 207      | 330   |
| 11  | -        | 576   | 100    | 114  | 163      | 131   |
| 12  | 1,921    | 1,040 | 1,147  | 385  | 163      | 283   |
| 13  | 98       | 115   | 62     | 46   | 58       | 126   |
| 14  | -        | -     | -      | -    | -        | 54    |
| 15  | -        | -     | -      | -    | -        | 41    |
| 16  | 120      | 92    | 168    | -    | 59       | -     |
| 17  | -        | -     | 40     | -    | 64       | 40    |
| 18  | 78       | -     | -      | 221  | -        | -     |
| 19  | -        | 65    | -      | -    | -        | -     |
| 20  | -        | 64    | -      | -    | 44       | -     |
| 21  | -        | -     | -      | -    | 257      | -     |
| 22  | -        | -     | -      | -    | 53       | -     |
| 23  | 48       | 43    | -      | 50   | -        | -     |
| 24  | -        | 129   | 86     | -    | 116      | 57    |
| 25  | 1,430    | 1,523 | 606    | 327  | 149      | 320   |
| 26  | 279      | 391   | 447    | -    | -        | -     |
| 27  | 443      | 207   | 345    | 1769 | 223      | 131   |
| 28  | -        | 49    | -      | -    | -        | -     |
| 29  | 45       | 61    | 98     | -    | -        | 49    |
| 30  | -        | 479   | 136    | -    | 101      | 450   |
| 31  | 101      | 60    | 68     | 59   | 52       | -     |
| 32  | -        | 53    | -      | -    | -        | -     |
| 33  | 53       | 155   | 58     | -    | 41       | -     |
| 34  | 129      | 140   | -      | -    | -        | -     |
| 35  | 67       | 125   | 231    | -    | -        | -     |
| 36  | -        | 65    | -      | -    | -        | 804   |
| 37  | 125      | 393   | 56     | 70   | -        | -     |
| 38  | 137      | 221   | 141    | 168  | 89       | 101   |
| 39  | 88       | 790   | 143    | 254  | 236      | 1,369 |
| 40  | -        | 41    | -      | -    | -        | -     |
| 41  | 450      | 211   | -      | 69   | -        | -     |
| 42  | -        | -     | -      | -    | 54       | -     |
| 43  | -        | 639   | 100    | 317  | 1,516    | 4,634 |
| 44  | -        | -     | -      | -    | -        | 109   |
| 45  | 105      | 112   | -      | -    | -        | 48    |
| 46  | -        | 101   | -      | -    | -        | -     |
| 47  | -        | 42    | -      | -    | -        | -     |

|     |       |       |       |       |       |       |
|-----|-------|-------|-------|-------|-------|-------|
| 48  | -     | -     | 52    | -     | -     | -     |
| 49  | -     | -     | -     | -     | 55    | -     |
| 50  | 373   | -     | 42    | -     | -     | -     |
| 51  | 1,678 | 1,592 | 593   | 904   | 4,888 | 204   |
| 52  | -     | -     | 41    | -     | -     | 132   |
| 53  | -     | -     | -     | -     | 53    | 59    |
| 54  | -     | 84    | -     | -     | -     | -     |
| 55  | 58    | -     | -     | -     | -     | -     |
| 56  | -     | -     | -     | -     | 51    | -     |
| 57  | -     | -     | -     | -     | 368   | -     |
| 58  | 65    | -     | -     | -     | 63    | -     |
| 59  | 271   | 513   | 139   | 252   | 49    | 43    |
| 60  | -     | -     | -     | -     | 53    | -     |
| 61  | -     | 134   | 95    | 46    | 51    | -     |
| 62  | -     | 118   | 70    | -     | -     | 90    |
| 63  | 53    | 182   | 58    | -     | 41    | -     |
| 64  | -     | -     | -     | -     | -     | 40    |
| 65  | -     | 58    | -     | -     | -     | -     |
| 66  | 88    | 150   | -     | -     | -     | -     |
| 67  | -     | -     | 62    | 42    | 132   | 88    |
| 68  | -     | 47    | -     | -     | -     | -     |
| 69  | -     | -     | -     | -     | 170   | -     |
| 70  | 183   | 423   | 171   | 248   | 229   | 364   |
| 71  | 2,639 | 1,333 | 770   | 1,969 | 622   | 1,046 |
| 72  | 158   | 199   | -     | 45    | 44    | -     |
| 73  | 96    | 49    | 93    | 53    | 50    | 111   |
| 74  | -     | -     | -     | -     | -     | 60    |
| 75  | -     | -     | -     | -     | 158   | 851   |
| 76  | 40    | -     | -     | -     | 69    | 56    |
| 77  | 95    | 162   | 155   | -     | -     | 42    |
| 78  | -     | 324   | 65    | 64    | 146   | -     |
| 79  | 140   | 369   | 59    | 50    | -     | 51    |
| 80  | 144   | 322   | 91    | -     | 51    | -     |
| 81  | -     | -     | -     | -     | 58    | -     |
| 82  | -     | 88    | -     | 64    | 132   | 560   |
| 83  | -     | 75    | 83    | -     | -     | -     |
| 84  | -     | 297   | 71    | 67    | 104   | 123   |
| 85  | 395   | 57    | 100   | 93    | 54    | 81    |
| 86  | -     | -     | -     | -     | 60    | -     |
| 87  | -     | 48    | -     | -     | -     | -     |
| 88  | -     | -     | 44    | -     | -     | -     |
| 89  | -     | -     | -     | -     | -     | 52    |
| 90  | -     | -     | -     | 63    | -     | -     |
| 91  | 263   | 474   | 442   | 85    | 44    | 41    |
| 92  | -     | -     | -     | -     | 177   | -     |
| 93  | 43    | -     | -     | -     | -     | -     |
| 94  | -     | 220   | 72    | -     | 433   | 94    |
| 95  | -     | -     | 53    | -     | -     | -     |
| 96  | 56    | 43    | 229   | 41    | -     | 206   |
| 97  | -     | 108   | -     | -     | -     | -     |
| 98  | -     | 143   | 91    | 100   | 82    | 440   |
| 99  | 366   | 957   | 1,533 | 178   | 56    | 198   |
| 100 | 48    | -     | -     | -     | 84    | 52    |
| 101 | 61    | 1,852 | 220   | 143   | -     | 813   |

|     |       |       |     |     |       |     |
|-----|-------|-------|-----|-----|-------|-----|
| 102 | -     | 42    | -   | -   | -     | -   |
| 103 | 55    | -     | -   | -   | -     | -   |
| 104 | -     | -     | -   | -   | -     | 94  |
| 105 | -     | -     | -   | -   | -     | 53  |
| 106 | -     | -     | -   | -   | 101   | -   |
| 107 | 192   | 114   | 193 | 265 | 60    | 256 |
| 108 | -     | 109   | -   | 43  | 136   | -   |
| 109 | 170   | 88    | 51  | -   | 44    | 55  |
| 110 | -     | 87    | -   | -   | -     | -   |
| 111 | -     | 40    | -   | -   | -     | -   |
| 112 | -     | 51    | -   | -   | -     | -   |
| 113 | 115   | -     | 49  | -   | -     | -   |
| 114 | -     | -     | -   | -   | -     | 50  |
| 115 | -     | 65    | -   | -   | -     | -   |
| 116 | -     | -     | 41  | -   | -     | -   |
| 117 | -     | -     | 60  | -   | -     | -   |
| 118 | -     | -     | -   | -   | 111   | 48  |
| 119 | -     | 42    | -   | -   | -     | -   |
| 120 | 132   | -     | -   | 45  | 65    | -   |
| 121 | -     | -     | 47  | -   | -     | -   |
| 122 | -     | 102   | -   | -   | -     | 133 |
| 123 | -     | -     | -   | -   | 49    | -   |
| 124 | -     | 47    | -   | -   | -     | -   |
| 125 | -     | 45    | 54  | -   | -     | 45  |
| 126 | -     | 56    | -   | -   | -     | -   |
| 127 | 76    | 132   | -   | -   | -     | -   |
| 128 | -     | -     | -   | -   | -     | 40  |
| 129 | -     | -     | -   | -   | 41    | -   |
| 130 | -     | 56    | -   | -   | -     | -   |
| 131 | 49    | 148   | -   | -   | -     | -   |
| 132 | -     | -     | -   | -   | -     | 51  |
| 133 | -     | 138   | -   | -   | 336   | 478 |
| 134 | -     | -     | -   | -   | -     | 42  |
| 135 | -     | -     | -   | -   | 40    | -   |
| 136 | -     | 47    | -   | -   | -     | -   |
| 137 | 40    | 61    | -   | -   | 81    | 45  |
| 138 | -     | -     | -   | -   | 53    | 108 |
| 139 | -     | -     | -   | -   | 40    | -   |
| 140 | -     | -     | -   | -   | 69    | -   |
| 141 | -     | -     | -   | -   | -     | 132 |
| 142 | -     | 282   | -   | -   | -     | 49  |
| 143 | -     | -     | -   | -   | 204   | -   |
| 144 | 250   | 1,535 | 304 | 263 | 7,775 | 914 |
| 145 | 1,134 | 1,523 | 606 | 327 | 149   | 320 |

**Supplementary Table 2**

| <b>Hts sRNA</b>              | <b>sequence</b>                   |
|------------------------------|-----------------------------------|
| HVO_1885s<br>1               | AAACCACCACCCCATCGTCGTTCTGGTTCCC   |
| HVO_0404s<br>2               | CCACCATCGTCGACCGACCCCGCCGCTGGGG   |
| HVO_2522s<br>3               | CCCGTTGTCAGAGACCCTCCCGTTCGCGTCGG  |
| HVO_2019s<br>4               | CCACCACCACTACCGGGGCCTCTGGCCACATT  |
| HVO_2394s<br>5               | GGGAACGCAGGCCACGCTTCGTGGTCGGTCCC  |
| HVO_2488s<br>6               | GCTGCTGTCACAGGCACATCCGGGGTGGCGAA  |
| HVO_0799s<br>7               | ACGTCGTTCCATCCCGCTTTTTTCGGTTTTTT  |
| HVO_B0186s<br>8              | GCGTTCCACGAGGAACGCGCAGTCGTATCGTG  |
| HVO_1725s<br>9               | GATACTCGTGAAGTAAAGAAATACTCGTAA    |
| HVO_2213s<br>10              | TCAGCGGGGACCAATCGAGGGCGGCATTTGCC  |
| HVO_1038s<br>11              | GTTTCGATTCACCTCCGCGGTCGCGTCAGGAC  |
| HVO_2989s<br>12              | GAGAAGTGACGCTGGAGAGATAATGATCCCTC  |
| HVO_0906s<br>13              | ATGTCGGATACCGATATCCTCGGACTCGTGCT  |
| HVO_0104s<br>14              | TGGTGGGGTGGGGAGGGTGGAGTGGAGTAAA   |
| HVO_2619s<br>15              | GAAGGGTGGGAGTAGAACAGCGGGCCGGGAGA  |
| HVO_2293s<br>16 <sup>1</sup> | GTTAGTTATGAGGCCTCGGCACTCATAGGGCT  |
| HVO_2354s<br>HVO_17          | CCGACTGCGCGTGCAGTCATCATCAACCTCGC  |
| HVO_2821s<br>18              | GCTGTCATCTGAGGCAGCACCTTTTTCCCGGT  |
| HVO_2274s<br>19              | GAGAATCATTATGGCACCGCCTTCAGGTTTCGC |
| HVO_1083s<br>20              | AACCCGTGCCCCGAACCGCGCCGAGGCCGATAT |
| HVO_2583s<br>21              | CACCCCATCCCCTCCCATGCCCTCTTACCAA   |
| HVO_C0054s<br>22             | TTTACTAGCGCCAATCTGTGGTCTTATTGCGC  |
| HVO_A0232s<br>23             | GTGTCGAGGTCCGGGTCCTTCTCCGGTCCC GC |
| HVO_A0064s<br>24             | GTAGTAGAAATAATGAAAATATATCTTCTAGC  |
| HVO_1456s<br>25              | ATGTCCAAGAAGGCCAAACCCGTCCTGCTACT  |
| HVO_1700s<br>26              | GCCGGGGTGCCTCTGACAACCGGCTTATCGTT  |

<sup>1</sup> This sRNA has recently been identified as box C/D snoRNA (Joardar, Malliahgari, Skariah and Gupta (2011) RNA Biology 8: 782-791).

|                  |                                   |
|------------------|-----------------------------------|
| HVO_2520s<br>27  | GTACCCGTGAATTCGGGATGGTTTCAGACGAA  |
| HVO_2805s<br>28  | TGAACGGGACCGATCAATTCATGTTCCGCCGTG |
| HVO_2804s<br>29  | TCTCTCGCCGTTTTCACTCACGTTTTCCGGACC |
| HVO_2868s<br>30  | TCAGCGGGGACCAATTCAGGGCGGCATGCCGT  |
| HVO_1976s<br>31  | GAAGCGGCAACCAAGCAACCGCCGCCCGTCCG  |
| HVO_1345s<br>32  | ATGGAACGGGAGGTGACGGGACGCCATCTCGA  |
| HVO_1273s<br>33  | ATGGACTCCACGTGTCCC GCCCCTCGCGCAT  |
| HVO_0582s<br>34  | GCGTAAGACGGTTGTCTTACAGCTCCCCGACG  |
| HVO_0598s<br>35  | TATACAGGGGAGGTTTTACCCAGTGTCCGTGG  |
| HVO_0526s<br>36  | ACTTGATCTTGGACTCATCGAATAGAACCTTT  |
| HVO_0379s<br>37  | ACAGAGGAGGCAGACATGACAGCTCAATCGTC  |
| HVO_0400s<br>38  | GCGAGCGACCGTAACACGGTCAATATGAATT   |
| HVO_0049s<br>39  | AACCATGGCGCCTCGCAGCACTTGCGCCACCT  |
| HVO_0263s<br>40  | GTTCACTAGACAAGGAAACTAGAATTGCGATT  |
| HVO_0259s<br>41  | ACGGAACCCTGAGAGACACCGTCGGCTGGAGA  |
| HVO_0245s<br>42  | CCTGCCCTCTCCCCGCCGTCTCGCGCCGCCCT  |
| HVO_0197s<br>43  | GCATGACCACTGAAGCGACAAAAGACCACCAC  |
| HVO_0198s<br>44  | CTCCTCCCCGTCCGGCTCGTAACGTAGTTTTTT |
| HVO_0099s1<br>45 | ATTGGTCATGCACACCAACGCACTCGCCACGG  |
| HVO_0099s2<br>46 | ATGGATAGACAGCAGTTCCTCGCGTTGACGCT  |
| HVO_2412s<br>47  | ATTGTTGTAAACTCTAACGCCGATACGTCCGT  |
| HVO_2501s<br>48  | GACGCGGGAGCAGTCCGGTGGTGGGACTTTCC  |
| HVO_2433s<br>49  | CTAAAGGCGCGGGATTAACCCGTCAACCCCTC  |
| HVO_2736s<br>50  | ACAGCCTGTCCGGGGTTGATGAACCTCCTCGC  |
| HVO_2071s<br>51  | GTACCCCTGCCCATCCCCGCTAAAAAACAAA   |
| HVO_2072s<br>52  | CTCGTTCGGTCTTTTATTTTCTTTCAACAAA   |
| HVO_2201s<br>53  | CCAACTATCCGGTCCCGACCTCGACTTCCGCC  |
| HVO_1425s<br>54  | ATGGCAGGTGACTACTGGTGTGAGGAGTGCCA  |
| HVO_1379s<br>55  | GAGGCTTATGATGCCGCTTATCGCGTTCTAAC  |
| HVO_1831s<br>56  | TTTTCTCGCGACGCCACCCATCCCCGGCGAACC |



|                   |                                    |
|-------------------|------------------------------------|
| HVO_1072s<br>57   | ACACCGACACGGCCGCGGCGTTCAGAGCCGCGT  |
| HVO_1101s<br>58   | GTGAACGACGCGACGCGGCCCTCGCAGGTCAC   |
| HVO_1271s<br>59   | ACAAGCCCGGTTTTCGGACGGCGTTACACAAGA  |
| HVO_1244s<br>60   | CACACCACCTCTCGCGCGGGATTTCGCGCACGC  |
| HVO_2723s<br>61   | ACCAGAAACCCGCGGGAAAATACGGGCGCGCC   |
| HVO_2073s<br>62   | ACTCGCAACGACAGGCCAGTAACATTCCACCT   |
| HVO_1273s<br>63   | ATGGACTCCACGTGTCCC GCCCCTCGCGCAT   |
| HVO_2089s<br>64   | ATATCGTCGCTTCTAATATATTCTCTCCATAT   |
| HVO_2120s<br>65   | ATCAGATAGAAATCCAAGTTCCCCATTATATT   |
| HVO_1422s1<br>66  | TCCATTGTGAGGCCGCGGTCCGGGTCGAGGAC   |
| HVO_1422s2<br>67  | CCGGCTGACGGTCCCTTTCACC             |
| HVO_1907s<br>68   | ACGTGTTCCGAATAAAGACACAATATACAATC   |
| HVO_1950s<br>69   | CCACCACCACAACCACCAGAGCGGCTCAACCC   |
| HVO_0864s<br>70   | TCGAACTTCTCCTGCGAATCCATATCCAACAA   |
| HVO_0879s<br>71   | ACCTGAGCGCCTCCGGCGTTCCGGCGGCATCG   |
| HVO_2908s<br>72   | GTGGACGCCGGAAGGGAACGAGGGTAGGGGTA   |
| HVO_1834s<br>73   | ACTCATACGGATCTGGTTTTAGATACCGTATA   |
| HVO_1106s<br>74   | CTCAATCCAGCCGTA CTCCAGTATTTAAAAAA  |
| HVO_1148s<br>75   | TCCACTCACTTCCTTTTCGGTCACTTCGTTCCC  |
| HVO_C0073s<br>76  | GCCGTCACCGGCCACTGTGAGCAACATATTTG   |
| HVO_C0066s<br>77  | ATATCACAGGACTGGTTGAGCTACGTTTCTAA   |
| HVO_C0057s1<br>78 | GTAGCCGCTTTTTAATTTTGAATTGGGTTGGA   |
| HVO_C0057s2<br>79 | GAGGACGCGGACTTGGCCCGCTGGCTTAGACC   |
| HVO_C0036s<br>80  | GCGCGTCTGCTGCCATCACAATCACCATTTCGC  |
| HVO_C0020s<br>81  | ATCGACCCTGAGTAAGCCTCTTTCAACTGTTC   |
| HVO_C0001s<br>82  | ATTCTCATCCGCTCCTCCTTTACACCTGAAGG   |
| HVO_C0030s<br>83  | TTGAGTTAGTTGGTCGCGGACACGCATCCCCG   |
| HVO_B0156s<br>84  | GATGGGCTTAGCGGTTCGAGAGCCCAGAATTGT  |
| HVO_B0193s<br>85  | GCGATGGGCCCCCGCCGA ACTGACGCCGGACTG |
| HVO_B0371s<br>86  | GTCGTCGTCGTTGTGTACGACGCTTTCATTCT   |

|                   |                                    |
|-------------------|------------------------------------|
| HVO_B0329s<br>87  | GGACTTCAACCATGAAAGTGGAGAAAGAAGGA   |
| HVO_A0156s<br>88  | GTATTATGTATATTTGTGATATCGCCACTCCT   |
| HVO_B0155s<br>89  | ATACAATCATCGCAAATGCTCTACACTATTT    |
| HVO_A0212s<br>90  | GAGTGCGGTTTTGAGACGAACCCTTGTAATAAAA |
| HVO_A0632s<br>91  | GTTAGGTTAGAACGCAGGCGTTTCGAGCACCGA  |
| HVO_A0633s<br>92  | CCCTCCACCACTCGGAGTGACGATTTCTTTTCG  |
| HVO_A0126s<br>93  | ACGTACCCTTCGTCAGGTGTATGGAGTCCACT   |
| HVO_A0018s<br>94  | ATAGACCTGAAGGCGCTCAGCGCCCGACACCG   |
| HVO_B0186s<br>95  | GTCTAATCCAGGCGACCGCTCTCTATTTCGAGC  |
| HVO_A0638s<br>96  | GTAATACGGGCAACTATAATAGTTATATAGTA   |
| HVO_A0596s<br>97  | GACCCTCTGTATCTGGGGCGCGCTTGGTGGGG   |
| HVO_A0257s<br>98  | AGCTACATTCTCCACAACAAAAAAGACGAAT    |
| HVO_A0240s<br>99  | ACATTTCGAGTCTCCCGCTTCCCTTCCCTTTGC  |
| HVO_A0143s<br>100 | ATGTCGGGGCCATGCGTTCTAGTTTAGCAGAG   |
| HVO_A0131s<br>101 | ATGGATACCCCTCCAAGAGCCTTCATGCTTGG   |
| HVO_B0327s<br>102 | AATGGGAACCTCACACGGTCGTACTTCAACT    |
| HVO_A0035s<br>103 | ACGAACGGTTGCGGGATGTCTTCGGACCGTGA   |
| HVO_A0024s<br>104 | TATTGTTCAAGTAGAGGTAGCTTTTCGTAAGG   |
| HVO_A0015s<br>105 | AATATACCCCGACAGACCAGTACGAATTTGCT   |
| HVO_A0547s<br>106 | ACGCCACCGCATCCGGCGCGCTTCGACGAATG   |
| HVO_1132s<br>107  | ATCTCATTTTTTCGCCGGCTCGGAGGGCAAGG   |
| HVO_1954s<br>108  | GAACGCGACCGACACCACCTTCTCACTTTTAA   |
| HVO_1675s<br>109  | AAGGCCAGTCCAAGCCGATTATTCTTTTCGTC   |
| HVO_1310s<br>110  | GATGAGTTCATGCGTCGGCGCTGTGAACCCGG   |
| HVO_2036s<br>111  | AGCTAGATCTGCATACCGAATTTAACTTTTTTC  |
| HVO_2006s<br>112  | ACGCCGCGCGGGCCACAAGCCACCCCGCGCGG   |
| HVO_C0036s<br>113 | GCTAATTGTGATGGCAGCAGACGCGCATCCCG   |
| HVO_2957s<br>114  | TATCTCTCGGTGATGTTTGGGTTACCCGAAT    |
| HVO_2806s<br>115  | CTCAGTGGTAGAGCACACCGGCACAGGCCCTC   |
| HVO_B0186s<br>116 | GCGTTCCACGAGGAACGCGCAGTCGTATCGTG   |

|                   |                                   |
|-------------------|-----------------------------------|
| HVO_2787s<br>117  | GTTGCTCGGGCGTGCGGGCGGCCGCAACGGAC  |
| HVO_2757s<br>118  | CATCGCTCCCGTGCTCGCCAGCCCGCATGTGT  |
| HVO_2701s<br>119  | GAGGCGTGGCGACTGTGAACCGCAATTCACCC  |
| HVO_1833s<br>120  | ATCGCGGTTGCTCCGCGCCCCACCCCTCTGT   |
| HVO_2451s<br>121  | CGACGGGTGCCGGGCAGGGATGCTGGTCGCGC  |
| HVO_2399s<br>122  | CGATTTGCTATCGCGATATTCGATTTATTTTC  |
| HVO_0000s<br>123  | GCATCATCTGGAATCGCCTTCTTCGGCGTGAT  |
| HVO_0061s<br>124  | ACAATTAGTGGCCACTATATGAAATAAACTCG  |
| HVO_0276s<br>125  | GCGTCCATAACTCAATTTTTAATTAGTATCGA  |
| HVO_0809s<br>126  | GTGACCGCGACGGGTCTCCCCGACAACATGCG  |
| HVO_1183s<br>127  | ATGACACGGAGTACCCACGCTCCTGATCGAGT  |
| HVO_1779s<br>128  | ACTCATTTGTTTCGCCAGACGAACGTTGTTCT  |
| HVO_1876s<br>129  | GCTTCGGAAGGCGGTTTCAAGCGAAGCGTAGC  |
| HVO_1034s<br>130  | AACTGACCGGGTGACGATGGCACGAGATACGA  |
| HVO_0942s<br>131  | ATGGCCGTTGATTCGACAGCAGAGGGAGCCGC  |
| HVO_0988s<br>132  | ATTCGGTTCAACTCCGTTTCGATTTCTTTTATT |
| HVO_0880s<br>133  | CTCTAAACTTCGGTCACTTTCTCTCTTTCGT   |
| HVO_0727s<br>134  | TTCGAATTCGTCTACTAATCAAGAGGTGCGTC  |
| HVO_0676s<br>135  | CCGACGCGACCCCATTTTTGACAAACAAAAAA  |
| HVO_0557s<br>136  | AGCAGAATCTCCATCAAGTCAGCACGCCACTT  |
| HVO_0457s<br>137  | CCACCACAGACCCGACCGTATCAACTGTTCCG  |
| HVO_0456s<br>138  | ACACGACCTCCGACCACGCGAATTTTTATCAA  |
| HVO_0238s<br>139  | CACGCCCAACACCGATTTTTCTTTCAAAAAAA  |
| HVO_0249s<br>140  | CCTGACCTGACCTGACGACGCGACGGAGTCGC  |
| HVO_0311s<br>141  | ACTAACCCTCATCGTCGCTTCTTTTTTACAAA  |
| HVO_0496s<br>142  | TTCAGTACCAGACGAATCGATTTCTGAGCGTT  |
| HVO_0480s<br>143  | TACCCACCACTAAGTAACTCCTCTACGTTCTT  |
| HVO_B0275s<br>144 | GCTGTCTGGTCGGCGGACAGGTGACATATCTG  |
| HVO_1456s<br>145  | ATGTCCAAGAAGGCCAAACCCGTCTGCTACT   |

**Supplementary Table 3.**

| <b>tRNA</b>   | <b>start/ direction length</b> | <b>tRF (5, 3' CCA, 3' trailer)</b> | <b>reads at condition</b>                          |
|---------------|--------------------------------|------------------------------------|----------------------------------------------------|
| tRNA3-AlaCGC  | 329,507/ F<br>72 bp            | 3' trailer                         | 1,136 - normal (stat)                              |
| tRNA48-AspGTC | 311,755/ R<br>73 bp            | 3' trailer                         | 1,555 - high T (expo)                              |
| tRNA1-GlnCTG  | 11,661/ F<br>73 bp             | 3' trailer<br>3' CCA               | 1,229 - high T (expo)<br>2,265 - high T (stat)     |
| tRNA23-GlyGCC | 2,420,668/ F<br>71 bp          | 3' trailer                         | 2,277 - normal (expo)<br>1,615 - normal (stat)     |
| tRNA50-HisGTG | 259,298/ R<br>73 bp            | 3' trailer                         | 1,550 - low salt (stat)                            |
| tRNA37-LysCTT | 1,546,150/ R<br>74 bp          | 3' trailer                         | 1,303 - low salt (expo)<br>1,061 - low salt (stat) |
| tRNA8-MetCAT  | 633,681/ F<br>75 bp            | 5'                                 | 1,591 - low salt (stat)                            |
| tRNA7-SerCGA  | 575,668/ F<br>85 bp            | 3' trailer                         | 1,032 - low salt (stat)                            |
| tRNA42-ThrCGT | 840,913/ R<br>73 bp            | 3' trailer                         | 1,588 - normal (expo)<br>1,352 - high T (expo)     |
| tRNA11-TrpCCA | 1,165,740/ F<br>177 bp         | 3' trailer                         | 1,149 - low salt (stat)                            |
| tRNA20-ValGAC | 2,328,336/ F<br>75 bp          | 3' trailer                         | 1,097 - high T (expo)                              |

Supplementary Table 4.

| condition <sup>*1</sup>           | growth yields (and standard deviations)<br>of parent strain (100%) and mutants |                                   |      |               |      |               |       |
|-----------------------------------|--------------------------------------------------------------------------------|-----------------------------------|------|---------------|------|---------------|-------|
|                                   | wild<br>type                                                                   | sRNA <i>gene</i> deletion mutants |      |               |      |               |       |
|                                   | H119                                                                           | <i>Δhts4</i>                      |      | <i>Δhts10</i> |      | <i>Δhts21</i> |       |
| acetate                           | 100%                                                                           | 76%                               | (2%) | 87%           | (3%) | 134%          | (7%)  |
| CAS                               | 100%                                                                           | 95%                               | (1%) | 95%           | (2%) | 103%          | (2%)  |
| xylose                            | 100%                                                                           | 98%                               | (2%) | 91%           | (2%) | 101%          | (2%)  |
| 1.2 M NaCl                        | 100%                                                                           | 95%                               | (2%) | 113%          | (1%) | 92%           | (9%)  |
| 2.1 M NaCl                        | 100%                                                                           | 87%                               | (2%) | 98%           | (2%) | 120%          | (2%)  |
| 4 M NaCl                          | 100%                                                                           | 84%                               | (3%) | 89%           | (3%) | 127%          | (2%)  |
| salt<br>stress <sup>*2</sup>      | 100%                                                                           | 94%                               | (2%) | 101%          | (3%) | 264%          | (24%) |
| cold<br>stress <sup>*2</sup>      | 100%                                                                           | 97%                               | (2%) | 112%          | (2%) | 103%          | (23%) |
| EtOH<br>stress <sup>*2</sup>      | 100%                                                                           | 79%                               | (1%) | 94%           | (2%) | 120%          | (6%)  |
| oxidative<br>stress <sup>*2</sup> | 100%                                                                           | 80%                               | (2%) | 92%           | (1%) | 95%           | (1%)  |

<sup>\*1</sup> Standard conditions are 2.1 M NaCl, glucose as carbon source.

<sup>\*2</sup> Stress conditions were applied at mid-exponential growth.

## Supplementary Table 5

### A. up regulated

| HVO number      | gene name/function                                                                               | no. of spots | regulation level (mean value) |
|-----------------|--------------------------------------------------------------------------------------------------|--------------|-------------------------------|
| HVO_0259        | hypothetic protein                                                                               | 1            | 55.28                         |
| HVO_0255 - 0258 | spermine/spermidine synthase family protein; conserved protein; XerC/D-like integrase            | 1            | 16.61                         |
| HVO_0160        | CAAX amino terminal protease family, transmembrane                                               | 1            | 14.27                         |
| HVO_2079        | conserved protein                                                                                | 1            | 12.82                         |
| HVO_0266 - 0271 | all hypothetic proteins upstream of an ISH                                                       | 5            | 11.15                         |
| HVO_B0128       | glucose 1-dehydrogenase related protein                                                          | 1            | 5.26                          |
| HVO_0260 - 0261 | PhiH1 repressor-like; putative repressor phrH2                                                   | 1            | 5.07                          |
| HVO_2447 - 2448 | probable integral membrane protein; transcription initiation factor TFB                          | 1            | 4.60                          |
| HVO_0299        | membrane protein, putative                                                                       | 1            | 4.20                          |
| HVO_0226 - 0228 | transcription initiation factor TFB; conserved prot.; cell division inhibitor                    | 1            | 4.13                          |
| HVO_0273 - 0274 | all hypothetic proteins                                                                          | 1            | 3.79                          |
| H11.1r          | sRNA H11.1r                                                                                      | 2            | 3.76                          |
| HVO_1717 - 1719 | 7-cyano-7-deazaguanine synthase; 7-carboxy-7-deaz. syn.; 6-carboxy-5,6,7,8-tetrahydropterin syn. | 2            | 3.76                          |
| HVO_0219        | conditioned medium-induced protein 4                                                             | 1            | 3.46                          |
| HVO_0278 - 0279 | conserved protein                                                                                | 1            | 3.40                          |
| HVO_1210 - 1212 | flagellin A1; flagellin A2; KaiC-type circadian regulator CirA                                   | 2            | 3.32                          |
| HVO_B0314       | ABC-type transport system permease protein (probable substrate glucose)                          | 1            | 3.29                          |
| 7HVO_A0603      | spurious ('wrong') ORF (pHV4: 606371 - 606499 F)                                                 | 1            | 3.13                          |
| HVO_B0318       | ABC-type transport system periplasmic substrate-binding protein (probable substrate glucose)     | 1            | 3.06                          |
| HVO_2514        | conditioned medium-induced protein 2                                                             | 1            | 2.85                          |
| HVO_1683 - 1684 | 4-alpha-glucanotransferase; threonyl-tRNA synthetase                                             | 1            | 2.68                          |
| HVO_A0035       | cell division protein FtsZ                                                                       | 1            | 2.60                          |

|                   |                                                                                           |   |      |
|-------------------|-------------------------------------------------------------------------------------------|---|------|
| HVO_A0062 - A0064 | homologue to ISH4-type transposase; hypothetic protein; Orc1-type DNA replication protein | 1 | 2.57 |
| sRNA132           | sRNA132                                                                                   | 2 | 2.42 |
| HVO_C0087 - C0089 | all hypothetic proteins                                                                   | 1 | 2.19 |
| HVO_0493 - 0496   | all conserved proteins                                                                    | 1 | 2.16 |
| HVO_C0034 - C0035 | conserved protein; transfer complex protein, putative                                     | 1 | 2.15 |
| HVO_B0217 - B0218 | ABC-type transport system periplasmic substrate-binding protein                           | 1 | 2.14 |
| HVO_A0447         | probable integral membrane protein                                                        | 1 | 2.10 |
| HVO_1895 - 1897   | putative KEOPS component Kae1-Bud32; ribosomal protein S24.eR; cons. prot                 | 1 | 2.02 |

### B. down regulated

| HVO number | gene name/function                | no. of spots | regulation level (mean value) |
|------------|-----------------------------------|--------------|-------------------------------|
| HVO_2160   | Muc19 precursor, putative         | 3            | 0.44                          |
| HVO_2401   | glycine cleavage system P-protein | 1            | 0.49                          |

**Supplementary Table 6**

| <b>tRNA</b>   | <b>strand/ start / length</b> | <b>tRF (5', 3' CCA, 3' trailer)</b> | <b>condition/ number of reads</b> |
|---------------|-------------------------------|-------------------------------------|-----------------------------------|
| tRNA3-AlaCGC  | chr (+)<br>329,507<br>72 bp   | 3' trailer                          | 2 / 1,136                         |
| tRNA10-AlaGGC | chr (+)<br>1,048,559<br>72 bp |                                     |                                   |
| tRNA12-AlaTGC | chr (+)<br>1,599,762<br>72 bp |                                     |                                   |
| tRNA28-AlaTGC | chr (-)<br>2,769,994<br>72 bp |                                     |                                   |
| tRNA14-ArgCCG | chr (+)<br>1,692,867<br>73 bp |                                     |                                   |
| tRNA40-ArgCCT | chr (-)<br>1,061,493<br>73 bp |                                     |                                   |
| tRNA43-ArgGCG | chr (-)<br>452,351<br>73 bp   |                                     |                                   |
| tRNA39-ArgTCG | chr (-)<br>1,307,487<br>75 bp |                                     |                                   |
| tRNA2-ArgTCT  | chr (+)<br>121,223<br>74 bp   |                                     |                                   |
| tRNA4-AsnGTT  | chr (+)<br>457,852<br>73 bp   |                                     |                                   |
| tRNA49-AspGTC | chr (-)<br>311,653<br>73 bp   |                                     |                                   |
| tRNA48-AspGTC | chr (-)<br>311,755<br>73 bp   | 3' trailer                          | 3/ 1,555                          |
| tRNA13-CysGCA | chr (+)<br>1,603,383<br>77 bp |                                     |                                   |
| tRNA1-GlnCTG  | chr (+)<br>11,661<br>73 bp    | 3' trailer<br>3' CCA                | 3/ 1,229<br>4/ 2,265              |
| tRNA9-GlnTTG  | chr (+)<br>781,200<br>104 bp  |                                     |                                   |
| tRNA27-GluCTC | chr (+)                       |                                     |                                   |



|               |                                |            |                         |
|---------------|--------------------------------|------------|-------------------------|
|               | 2,759,237<br>75 bp             |            |                         |
| tRNA25-GluTTC | chr (+)<br>2,646,860<br>75 bp  |            |                         |
| tRNA35-GlyCCC | chr (-)<br>1,733,316<br>71 bp  |            |                         |
| tRNA22-GlyGCC | chr (+)<br>2,420,585<br>71 bp  |            |                         |
| tRNA23-GlyGCC | chr (+)<br>2,420,668<br>71 bp  | 3' trailer | 1 / 2,277,<br>2 / 1,615 |
| tRNA41-GlyTCC | chr (-)<br>937,864<br>71 bp    |            |                         |
| tRNA50-HisGTG | chr (-)<br>259,298<br>73 bp    | 3' trailer | 8 / 1,550               |
| tRNA18-IleGAT | chr (+)<br>2,217,987<br>74 bp  |            |                         |
| tRNA26-LeuCAA | chr (+)<br>2,693,483<br>84 bp  |            |                         |
| tRNA30-LeuCAG | chr (-)<br>2,617,832<br>85 bp  |            |                         |
| tRNA31-LeuGAG | chr (-)<br>2,564,774<br>85 bp  |            |                         |
| tRNA34-LeuTAA | chr (-)<br>2,082,040<br>85 bp  |            |                         |
| tRNA38-LeuTAG | chr (-)<br>1,526,268<br>83 bp  |            |                         |
| tRNA37-LysCTT | chr (-)<br>1,546,150<br>74 bp  | 3' trailer | 7 / 1,303,<br>8 / 1,061 |
| tRNA15-LysTTT | chr (+)<br>1,706,125<br>74 bp  |            |                         |
| tRNA5-MetCAT  | chr (+)<br>458,021<br>75 bp    |            |                         |
| tRNA8-MetCAT  | chr (+)<br>633,681<br>75 bp    | 5'         | 8 / 1,591               |
| tRNA21-MetCAT | chr (+)<br>2,384,839<br>149 bp |            |                         |
| tRNA46-PheGAA | chr (-)                        |            |                         |

|               |                                |    |                       |
|---------------|--------------------------------|----|-----------------------|
|               | 439,239<br>74 bp               |    |                       |
| tRNA45-PheGAA | chr (-)<br>441,236<br>74 bp    |    |                       |
| tRNA17-ProCGG | chr (+)<br>1,836,712<br>73 bp  |    |                       |
| tRNA32-ProGGG | chr (-)<br>2,358,758<br>71 bp  |    |                       |
| tRNA51-ProTGG | chr (-)<br>252,026<br>73 bp    |    |                       |
| tRNA7-SerCGA  | chr (+)<br>575,668<br>85 bp    | 3' | 8 / 1,032             |
| tRNA29-SerGCT | chr (-)<br>2,620,287<br>85 bp  |    |                       |
| tRNA47-SerGGA | chr (-)<br>408,343<br>81 bp    |    |                       |
| tRNA24-SerTGA | chr (+)<br>2,626,534<br>84 bp  |    |                       |
| tRNA42-ThrCGT | chr (-)<br>840,913<br>73 bp    | 3' | 1/ 1,588,<br>3/ 1,352 |
| tRNA16-ThrGGT | chr (+)<br>1,736,209<br>72 bp  |    |                       |
| tRNA11-TrpCCA | chr (+)<br>1,165,740<br>177 bp | 3' | 8 / 1,149             |
| tRNA6-TyrGTA  | chr (+)<br>518,441<br>74 bp    |    |                       |
| tRNA36-TyrGTA | chr (-)<br>1,590,379<br>74 bp  |    |                       |
| tRNA33-ValCAC | chr (-)<br>2,264,001<br>75 bp  |    |                       |
| tRNA19-ValGAC | chr (+)<br>2,328,216<br>75 bp  |    |                       |
| tRNA20-ValGAC | chr (+)<br>2,328,336<br>75 bp  | 3' | 3/ 1,097              |
| tRNA44-ValTAC | chr (-)<br>443,018<br>74 bp    |    |                       |

**Supplementary Table 7**

| <b>name</b>     | <b>sequence</b>                       | <b>used for</b>                                                                          |
|-----------------|---------------------------------------|------------------------------------------------------------------------------------------|
| hts4up          | CAACGTTGTCCGACGGAGCGGCCAGTCGAGC       | generation of the sRNA <i>hts4</i> gene fragment with 500 bp up- and downstream regions  |
| hts4do          | CTCGATGTTCTCCCGCTCGCACCGAACC          |                                                                                          |
| hts5up          | GTTGCGAGGTACCAGAAAGTGGGTTGGGGC        | generation of the sRNA <i>hts5</i> gene fragment with 500 bp up- and downstream regions  |
| hts5do          | CGAGGCCTACGGGACCGTCGACGAG             |                                                                                          |
| hts10up         | GGCAAAGCTCGCCCGAACGACC                | generation of the sRNA <i>hts10</i> gene fragment with 500 bp up- and downstream regions |
| hts10do         | GACCGACTGGAGGAGGTGGACCAC              |                                                                                          |
| hts21up         | CAGGACGAGGCGCAGGTCGTCGAGGG            | generation of the sRNA <i>hts21</i> gene fragment with 500 bp up- and downstream regions |
| hts21do         | CAGGCGCGGTCCGCGCTGTTGGCGAAG           |                                                                                          |
| hts4i1          | GACCAGATAGCTATCTGTTAGGTGAGC           | inverse PCR to delete the sRNA <i>hts4</i> gene                                          |
| hts4i2          | CAGCTGTTGGCCGTTGCGGCGGCC              |                                                                                          |
| hts5i1          | GTTTTAGGTATGCCTAAGAATCAC              | inverse PCR to delete the sRNA <i>hts5</i> gene                                          |
| hts5i2          | CCTCGCGAGCGACCGCGCCGACACC             |                                                                                          |
| hts10IP1        | CAAAGCGAAGCGTCACCTGAACGGAGTGC         | inverse PCR to delete the sRNA <i>hts10</i> gene                                         |
| hts10IP2        | TCGTATTCGCGCGCGCTCGAATCG              |                                                                                          |
| hts21i1         | GGACACGCCCCGCGGGTGCTCCCCGACG          | inverse PCR to delete the sRNA <i>hts21</i> gene                                         |
| hts21i2         | GGTGAAACTGGCGCTCGGCGTCGTCCG           |                                                                                          |
| hts4do          | CTCGATGTTCTCCCGCTCGCACCGAACC          | generation of a probe for southern of <i>hts4</i> gene deletion                          |
| hts4i2          | CAGCTGTTGGCCGTTGCGGCGGCC              |                                                                                          |
| hts5do          | CGAGGCCTACGGGACCGTCGACGAG             | generation of a probe for southern of <i>hts5</i> gene deletion                          |
| hts5i2          | CCTCGCGAGCGACCGCGCCGACACC             |                                                                                          |
| hts10up         | GGCAAAGCTCGCCCGAACGACC                | generation of a probe for southern of <i>hts10</i> gene deletion                         |
| hts10IP1        | CAAAGCGAAGCGTCACCTGAACGGAGTGC         |                                                                                          |
| hts21up         | CAGGACGAGGCGCAGGTCGTCGAGGG            | generation of a probe for southern of <i>hts21</i> gene deletion                         |
| hts21i1         | GGACACGCCCCGCGGGTGCTCCCCGACG          |                                                                                          |
| tRNA1-Gln(CTG)  | TGGTAGTCCCACCAGGATTCGAACCTG           | tRF northern tRNA1-Gln(CTG)                                                              |
| tRNA50-His(GTG) | CGCGGCGCTCACTGGTCGAAATGTAAAGAAGA      | tRF northern tRNA50-His(GTG)                                                             |
| hts4#1          | GGAGACCAGAATGTGGCCAGAGGCCCGGTAGTGGTGG | Hts northern Hts4                                                                        |
| hts5#1          | CTAACTGGGACCGACCACGAAGCGTGGCCTGCGTTCC | Hts northern Hts5                                                                        |
| hts10#1         | GCGGCCCGCGCGGCAAATGCCGCCCTAGATTGG     | Hts northern Hts10                                                                       |
| hts21           | CCGCGTGTGAAGAGTGGCATGGGAGGGGATGGGGTG  | Hts northern Hts21                                                                       |



Energy: -19.7 kcal/mol Position - mRNA:  
737 -- 753  
Hybridization Energy: -33.7 kcal/mol Position - ncRNA:  
4 -- 25  
Unfolding Energy - mRNA: 7.8 kcal/mol Position Seed - mRNA:  
747 -- 753  
Unfolding Energy - ncRNA: 6.2 kcal/mol Position Seed - ncRNA:  
4 -- 10

---

**Predicted interaction between hts10 and 0268-0271\_**

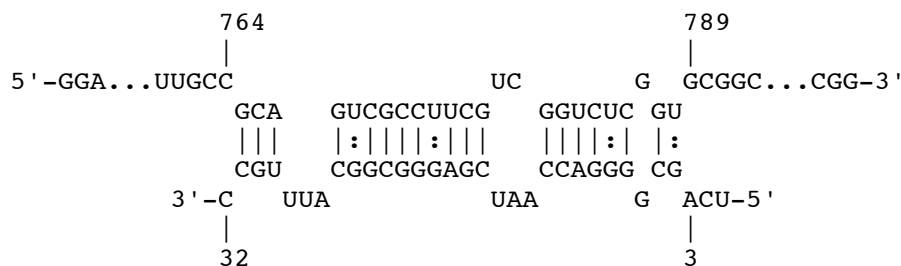

Energy: -18.6 kcal/mol Position - mRNA:  
765 -- 788  
Hybridization Energy: -33.4 kcal/mol Position - ncRNA:  
4 -- 31  
Unfolding Energy - mRNA: 8.6 kcal/mol Position Seed - mRNA:  
771 -- 777  
Unfolding Energy - ncRNA: 6.2 kcal/mol Position Seed - ncRNA:  
16 -- 22

---

**Predicted interaction between hts10 and 2079**

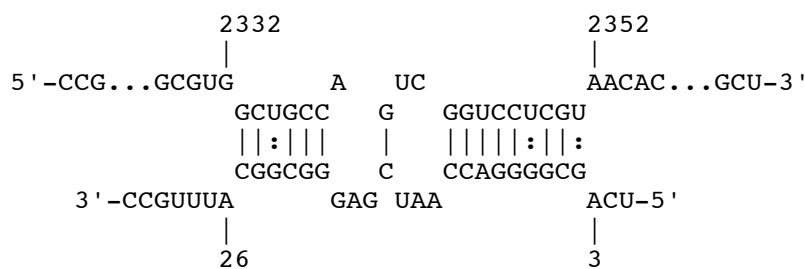

Energy: -16.8 kcal/mol Position - mRNA:  
2333 -- 2351  
Hybridization Energy: -29.3 kcal/mol Position - ncRNA:  
4 -- 25  
Unfolding Energy - mRNA: 6.3 kcal/mol Position Seed - mRNA:  
2345 -- 2351  
Unfolding Energy - ncRNA: 6.2 kcal/mol Position Seed - ncRNA:  
4 -- 10

---

**Predicted interaction between hts10 and 0299**

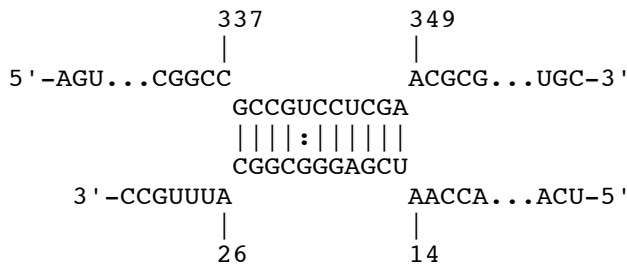

Energy: -16.7 kcal/mol Position - mRNA: 338 -- 348  
 Hybridization Energy: -24.2 kcal/mol Position - ncRNA: 15 -- 25  
 Unfolding Energy - mRNA: 3.1 kcal/mol Position Seed - mRNA: 342 -- 348  
 Unfolding Energy - ncRNA: 4.4 kcal/mol Position Seed - ncRNA: 15 -- 21

**Predicted interaction between hts10 and 0160**

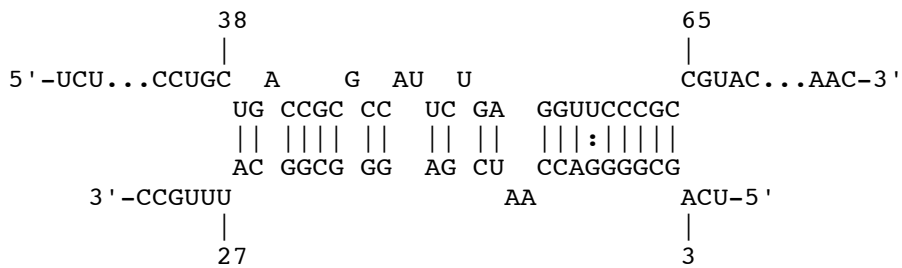

Energy: -15.4 kcal/mol Position - mRNA: -- 64  
 Hybridization Energy: -28.1 kcal/mol Position - ncRNA: -- 26  
 Unfolding Energy - mRNA: 6.5 kcal/mol Position Seed - mRNA: -- 64  
 Unfolding Energy - ncRNA: 6.2 kcal/mol Position Seed - ncRNA: -- 10

**Predicted interaction between hts10 and b0128**

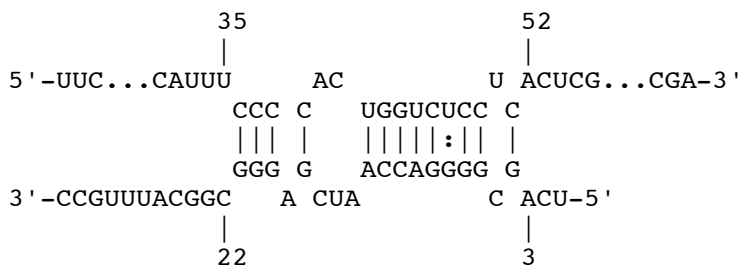

Energy: -14.1 kcal/mol Position - mRNA: -- 51  
 Hybridization Energy: -18.3 kcal/mol Position - ncRNA: -- 21  
 Unfolding Energy - mRNA: 1.3 kcal/mol Position Seed - mRNA: -- 49

Unfolding Energy - ncRNA: 3.0 kcal/mol  
-- 12

Position Seed - ncRNA: 6

---

**Predicted interaction between hts10 and 0257\_**

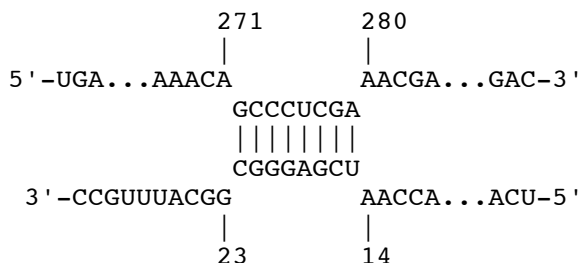

Energy: -12.8 kcal/mol Position - mRNA:  
272 -- 279  
Hybridization Energy: -15.8 kcal/mol Position - ncRNA:  
15 -- 22  
Unfolding Energy - mRNA: 2.1 kcal/mol Position Seed - mRNA:  
273 -- 279  
Unfolding Energy - ncRNA: 0.9 kcal/mol Position Seed - ncRNA:  
15 -- 21

---

**Predicted interaction between hts10 and 0259**

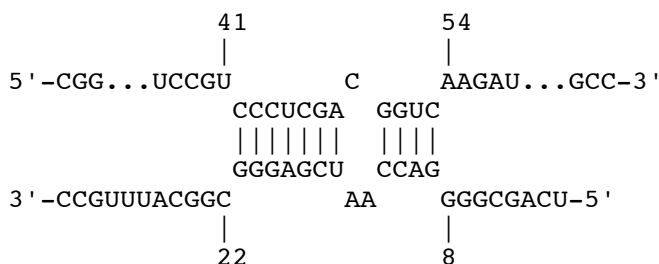

Energy: -12.5 kcal/mol Position - mRNA: 42  
-- 53  
Hybridization Energy: -18.7 kcal/mol Position - ncRNA: 9  
-- 21  
Unfolding Energy - mRNA: 3.3 kcal/mol Position Seed - mRNA: 42  
-- 48  
Unfolding Energy - ncRNA: 2.9 kcal/mol Position Seed - ncRNA: 15  
-- 21

---

**Predicted interaction between hts10 and 0267**

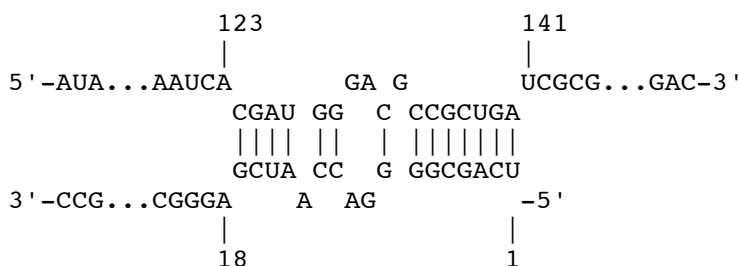

|                           |                |                        |
|---------------------------|----------------|------------------------|
| Energy:                   | -10.6 kcal/mol | Position - mRNA:       |
| 124 -- 140                |                |                        |
| Hybridization Energy:     | -22.9 kcal/mol | Position - ncRNA:      |
| 1 -- 17                   |                |                        |
| Unfolding Energy - mRNA:  | 9.6 kcal/mol   | Position Seed - mRNA:  |
| 134 -- 140                |                |                        |
| Unfolding Energy - ncRNA: | 2.6 kcal/mol   | Position Seed - ncRNA: |
| 1 -- 7                    |                |                        |

-----

**Predicted interaction between hts10 and 0266**

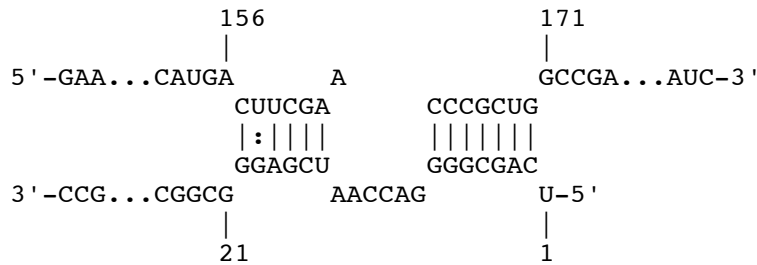

|                           |                |                        |
|---------------------------|----------------|------------------------|
| Energy:                   | -10.2 kcal/mol | Position - mRNA:       |
| 157 -- 170                |                |                        |
| Hybridization Energy:     | -21.3 kcal/mol | Position - ncRNA:      |
| 2 -- 20                   |                |                        |
| Unfolding Energy - mRNA:  | 8.1 kcal/mol   | Position Seed - mRNA:  |
| 164 -- 170                |                |                        |
| Unfolding Energy - ncRNA: | 3.0 kcal/mol   | Position Seed - ncRNA: |
| 2 -- 8                    |                |                        |

-----

**Predicted interaction between hts10 and 0260-0261**

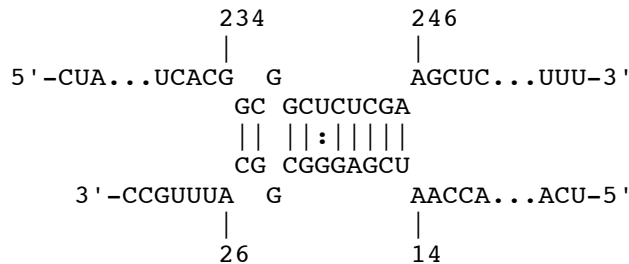

|                           |                |                        |
|---------------------------|----------------|------------------------|
| Energy:                   | -9.4 kcal/mol  | Position - mRNA:       |
| 235 -- 245                |                |                        |
| Hybridization Energy:     | -19.3 kcal/mol | Position - ncRNA:      |
| 15 -- 25                  |                |                        |
| Unfolding Energy - mRNA:  | 5.5 kcal/mol   | Position Seed - mRNA:  |
| 239 -- 245                |                |                        |
| Unfolding Energy - ncRNA: | 4.4 kcal/mol   | Position Seed - ncRNA: |
| 15 -- 21                  |                |                        |

-----



## B.

### Cluster I: mRNAs 0257, 0299 and 0260-0261

-----  
Predicted interaction between hts10 and **0257\_**

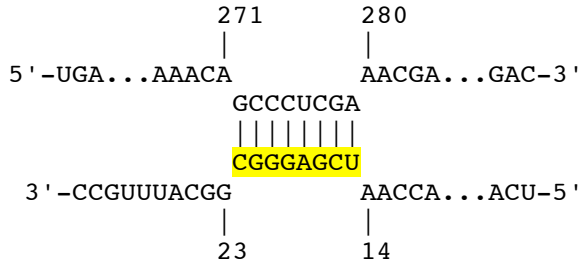

Energy: -12.8 kcal/mol Position - mRNA: 272 -- 279  
Hybridization Energy: -15.8 kcal/mol Position - ncRNA: 15 -- 22  
Unfolding Energy - mRNA: 2.1 kcal/mol Position Seed - mRNA: 273 -- 279  
Unfolding Energy - ncRNA: 0.9 kcal/mol Position Seed - ncRNA: 15 -- 21  
-----

Predicted interaction between hts10 and **0299**

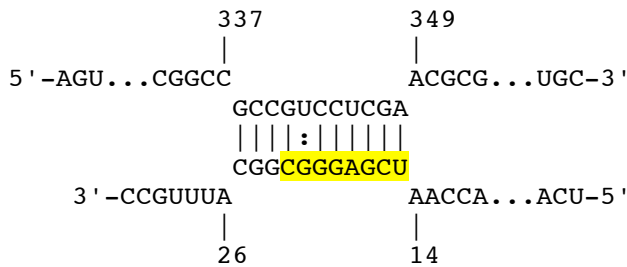

Energy: -16.7 kcal/mol Position - mRNA: 338 -- 348  
Hybridization Energy: -24.2 kcal/mol Position - ncRNA: 15 -- 25  
Unfolding Energy - mRNA: 3.1 kcal/mol Position Seed - mRNA: 342 -- 348  
Unfolding Energy - ncRNA: 4.4 kcal/mol Position Seed - ncRNA: 15 -- 21  
-----

Predicted interaction between hts10 and **0260-0261**

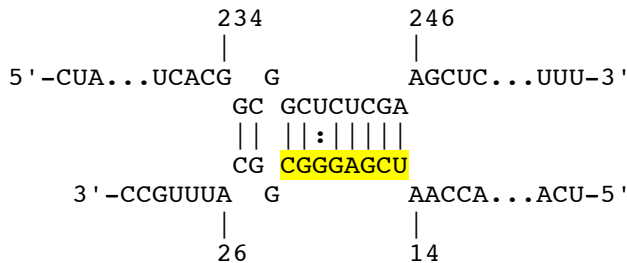

Energy: -9.4 kcal/mol Position - mRNA: 235 -- 245  
Hybridization Energy: -19.3 kcal/mol Position - ncRNA: 15 -- 25  
Unfolding Energy - mRNA: 5.5 kcal/mol Position Seed - mRNA: 239 -- 245  
Unfolding Energy - ncRNA: 4.4 kcal/mol Position Seed - ncRNA: 15 -- 21  
-----

## Cluster II: mRNAs 0259 and 0266

---

Predicted interaction between hts10 and **0259**

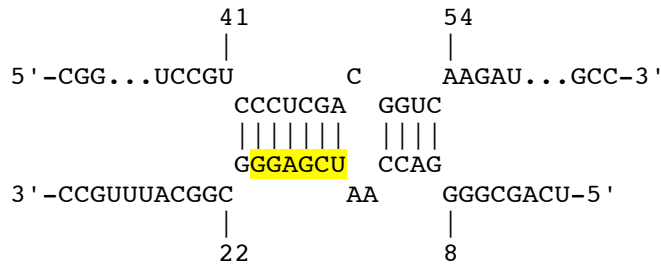

|                           |                |                        |          |
|---------------------------|----------------|------------------------|----------|
| Energy:                   | -12.5 kcal/mol | Position - mRNA:       | 42 -- 53 |
| Hybridization Energy:     | -18.7 kcal/mol | Position - ncRNA:      | 9 -- 21  |
| Unfolding Energy - mRNA:  | 3.3 kcal/mol   | Position Seed - mRNA:  | 42 -- 48 |
| Unfolding Energy - ncRNA: | 2.9 kcal/mol   | Position Seed - ncRNA: | 15 -- 21 |

---

Predicted interaction between hts10 and **0266**

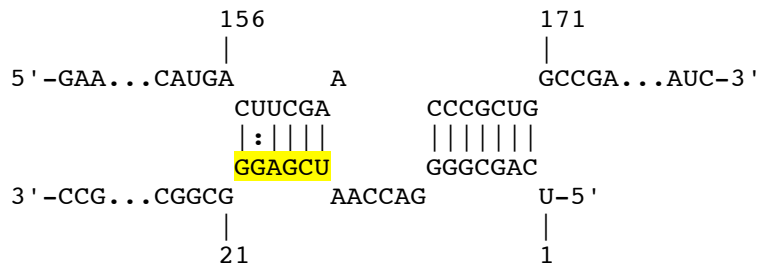

|                           |                |                        |            |
|---------------------------|----------------|------------------------|------------|
| Energy:                   | -10.2 kcal/mol | Position - mRNA:       | 157 -- 170 |
| Hybridization Energy:     | -21.3 kcal/mol | Position - ncRNA:      | 2 -- 20    |
| Unfolding Energy - mRNA:  | 8.1 kcal/mol   | Position Seed - mRNA:  | 164 -- 170 |
| Unfolding Energy - ncRNA: | 3.0 kcal/mol   | Position Seed - ncRNA: | 2 -- 8     |

---

### Cluster III: mRNAs 0299 and 0160

---

Predicted interaction between hts10 and **0299**

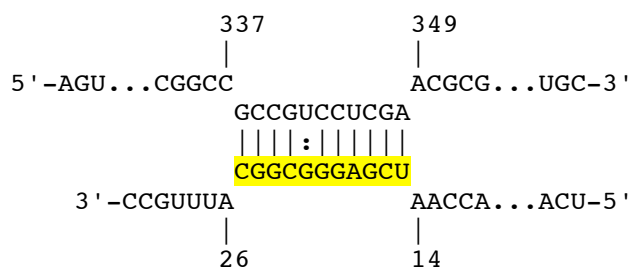

|                           |                |                        |            |
|---------------------------|----------------|------------------------|------------|
| Energy:                   | -16.7 kcal/mol | Position - mRNA:       | 338 -- 348 |
| Hybridization Energy:     | -24.2 kcal/mol | Position - ncRNA:      | 15 -- 25   |
| Unfolding Energy - mRNA:  | 3.1 kcal/mol   | Position Seed - mRNA:  | 342 -- 348 |
| Unfolding Energy - ncRNA: | 4.4 kcal/mol   | Position Seed - ncRNA: | 15 -- 21   |

---

Predicted interaction between hts10 and **0160**

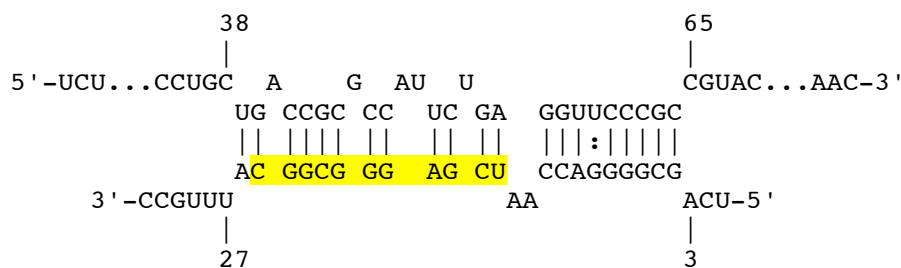

|                           |                |                        |          |
|---------------------------|----------------|------------------------|----------|
| Energy:                   | -15.4 kcal/mol | Position - mRNA:       | 39 -- 64 |
| Hybridization Energy:     | -28.1 kcal/mol | Position - ncRNA:      | 4 -- 26  |
| Unfolding Energy - mRNA:  | 6.5 kcal/mol   | Position Seed - mRNA:  | 58 -- 64 |
| Unfolding Energy - ncRNA: | 6.2 kcal/mol   | Position Seed - ncRNA: | 4 -- 10  |

---

## Cluster IV: mRNAs 0255-0256 and 2079

Predicted interaction between hts10 and **0255+0256**

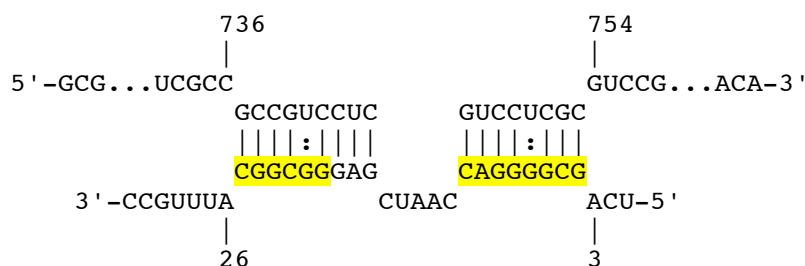

|                           |                |                        |            |
|---------------------------|----------------|------------------------|------------|
| Energy:                   | -19.7 kcal/mol | Position - mRNA:       | 737 -- 753 |
| Hybridization Energy:     | -33.7 kcal/mol | Position - ncRNA:      | 4 -- 25    |
| Unfolding Energy - mRNA:  | 7.8 kcal/mol   | Position Seed - mRNA:  | 747 -- 753 |
| Unfolding Energy - ncRNA: | 6.2 kcal/mol   | Position Seed - ncRNA: | 4 -- 10    |

Predicted interaction between hts10 and **2079**

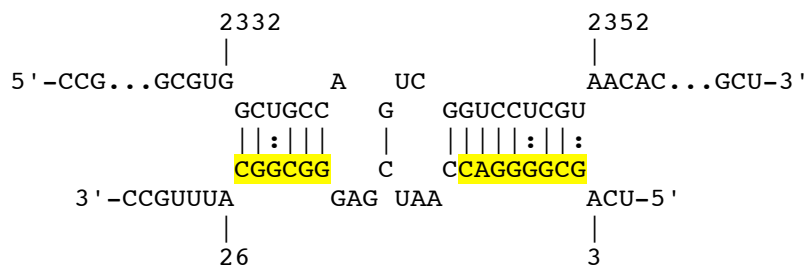

|                           |                |                        |         |
|---------------------------|----------------|------------------------|---------|
| Energy:                   | -16.8 kcal/mol | Position - mRNA:       | 2333 -- |
| Hybridization Energy:     | -29.3 kcal/mol | Position - ncRNA:      | 4 -- 25 |
| Unfolding Energy - mRNA:  | 6.3 kcal/mol   | Position Seed - mRNA:  | 2345 -- |
| Unfolding Energy - ncRNA: | 6.2 kcal/mol   | Position Seed - ncRNA: | 4 -- 10 |
